# Supplementary material
Source: PubMed Central journal article supplement (PMC5177456)
Supplement: NIHMS834764-supplement-3.pdf [file NIHMS834764-supplement-3.pdf]

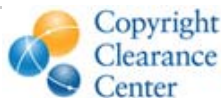

**Note:** Copyright.com supplies permissions but not the copyrighted content itself.

**1**  
PAYMENT

**2**  
REVIEW

**3**  
**CONFIRMATION**

### Step 3: Order Confirmation

**Thank you for your order!** A confirmation for your order will be sent to your account email address. If you have questions about your order, you can call us 24 hrs/day, M-F at +1.855.239.3415 Toll Free, or write to us at [info@copyright.com](mailto:info@copyright.com). This is not an invoice.

**Confirmation Number: 11605711**  
**Order Date: 11/15/2016**

If you paid by credit card, your order will be finalized and your card will be charged within 24 hours. If you choose to be invoiced, you can change or cancel your order until the invoice is generated.

#### Payment Information

Ming Pei  
mpei@hsc.wvu.edu  
+1 (304)2931072  
Payment Method: n/a

#### Order Details

##### Acta biomaterialia

**Order detail ID:** 70163799  
**Order License Id:** 3990361492422  
**ISSN:** 1742-7061  
**Publication Type:** Journal  
**Volume:**  
**Issue:**  
**Start page:**  
**Publisher:** ELSEVIER BV

**Permission Status:** **Granted**  
**Permission type:** Republish or display content  
**Type of use:** Journal/magazine

[View details](#)

**Note:** This item will be invoiced or charged separately through CCC's **RightsLink** service. [More info](#)

**\$ 0.00**

Total order items: 1

This is not an invoice.

**Order Total: 0.00 USD**
