# Supplementary material
Source: PubMed Central journal article supplement (PMC5177456)
Supplement: NIHMS834764-supplement-4.pdf [file NIHMS834764-supplement-4.pdf]

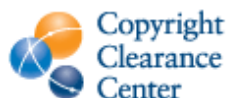

RightsLink®

[Home](#)[Create Account](#)[Help](#)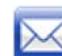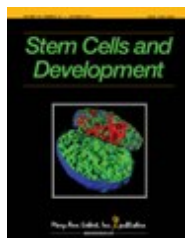

**Title:** Significance of Epigenetic Landscape in Cartilage Regeneration from the Cartilage Development and Pathology Perspective

**Author:** Jingting Li, James Ohliger, Ming Pei

**Publication:** Stem Cells and Development

**Publisher:** Mary Ann Liebert, Inc.

**Date:** Jun 1, 2014

Copyright © 2014, Mary Ann Liebert, Inc.

[LOGIN](#)

If you're a [copyright.com user](#), you can login to RightsLink using your copyright.com credentials. Already a [RightsLink user](#) or want to [learn more?](#)

### Permissions Request

Mary Ann Liebert, Inc. publishers does not require authors of the content being used to obtain a license for their personal reuse of full article, charts/graphs/tables or text excerpt.

[BACK](#)[CLOSE WINDOW](#)

Copyright © 2016 [Copyright Clearance Center, Inc.](#) All Rights Reserved. [Privacy statement](#). [Terms and Conditions](#). Comments? We would like to hear from you. E-mail us at [customercare@copyright.com](mailto:customercare@copyright.com)
